# Supplementary material
Source: PubMed Central journal article supplement (PMC5738526)
Supplement: mmc1.pdf [file mmc1.pdf]

**Biophysical Journal, Volume 113**

**Supplemental Information**

**Ultrahigh-Resolution Optical Coherence Elastography Images Cellular-Scale Stiffness of Mouse Aorta**

**Philip Wijesinghe, Niloufer J. Johansen, Andrea Curatolo, David D. Sampson, Ruth Ganss, and Brendan F. Kennedy**

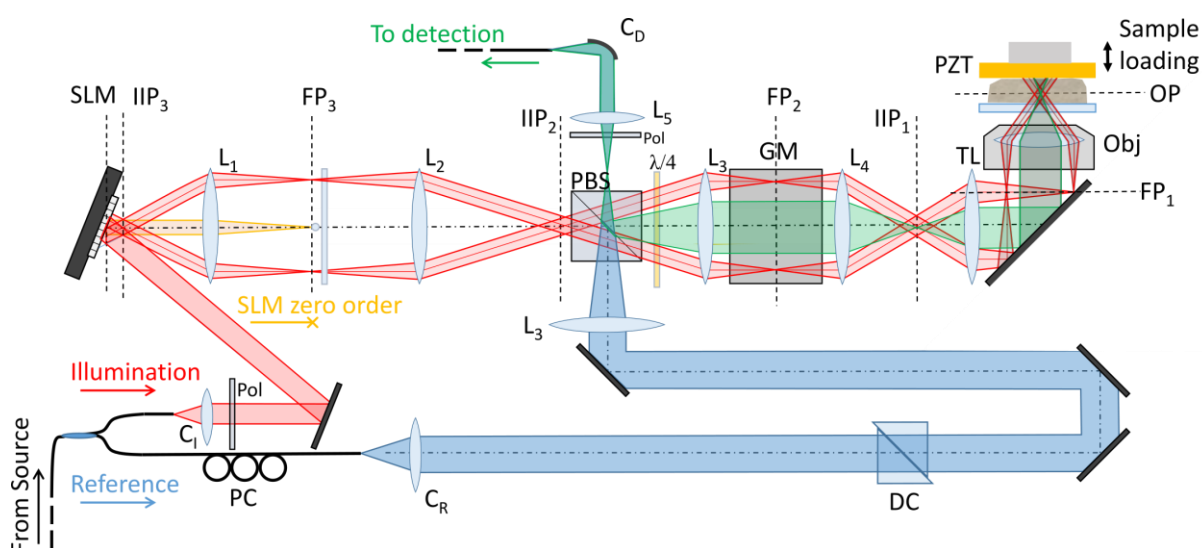

FIGURE S1 Optical setup of the ultrahigh-resolution optical coherence elastography system. Light from the supercontinuum source is split, in fiber, into free-space illumination and detection paths. Illumination light is shaped into a Bessel beam by a spatial light modulator (SLM). Galvanometer mirrors (GM) enable beam scanning across the sample. Back-scattered light from the sample is collected in the Gaussian mode, and interfered with the reference through a polarization beam splitter (PBS), with the polarization shift provided by a quarter-wave plate ( $\lambda/4$ ). The interfered light is collected by a single-mode fiber, and relayed to a spectrometer. Sample loading is shown in Fig. 1. C: collimator; L: lens; TL: tube lens; PC: polarization controller; DC: dispersion compensation; Pol: polarizer; Obj: objective; PZT: piezoelectric actuator; OP: objective plane; IIP: intermediate image plane; FP: Fourier plane.

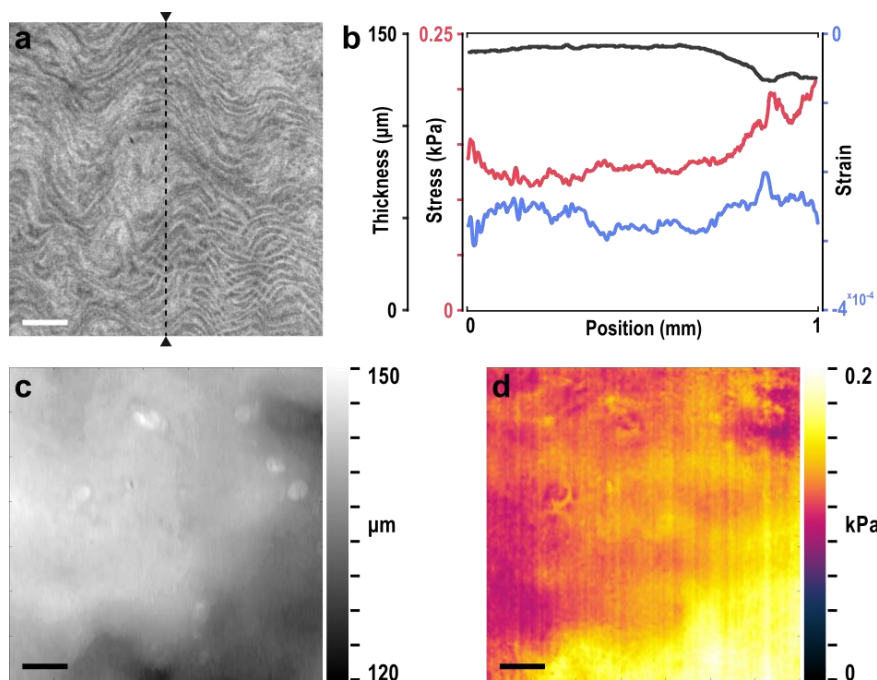

FIGURE S2 Intermediate outputs of ultrahigh-resolution optical coherence elastography. (a) En face ( $x,y$ ) structural image of an aorta virtually sliced 20  $\mu\text{m}$  past the adventitia, corresponding to Fig. 2 a. The dashed line indicates the location of the cross-section used to generate the plots in (b) of compliant layer (CL) thickness under bulk compression, and CL stress and sample strain from micro-scale actuation. Corresponding en face maps of total layer thickness (c) and stress from actuation (d). Scale bars are 100  $\mu\text{m}$ .
